# Supplementary material
Source: MDPI journal article supplement (https://www.mdpi.com/2079-6412/13/6/1130)
Supplement: s1 [file s1 › coatings-2458703-supplementary.pdf]

## Article

# Generation of Hybrid Lead Halide $\text{CH}_3\text{NH}_3\text{PbI}_{3-x}\text{Cl}_x$ Perovskite Crystals via Convective Self-Assembly

Ioan Petrovai <sup>1,2,†</sup>, Otto Todor-Boer <sup>3,†</sup>, Adriana Vulpoi <sup>2</sup>, Leontin David <sup>2</sup> and Ioan Botiz <sup>1,2,\*</sup>

<sup>1</sup> Faculty of Physics, Babes-Bolyai University, 400084 Cluj-Napoca, Romania; jpetrovai@gmail.com

<sup>2</sup> Interdisciplinary Research Institute on Bio-Nano-Sciences, Babes-Bolyai University, 400271 Cluj-Napoca, Romania; adriana.vulpoi@ubbcluj.ro (A.V.); leontin.david@ubbcluj.ro (L.D.)

<sup>3</sup> INCDO-INOE 2000, Research Institute for Analytical Instrumentation, 400293 Cluj-Napoca, Romania; otto.todor@icia.ro

\* Correspondence: ioan.botiz@ubbcluj.ro

† These authors contributed equally to this work.

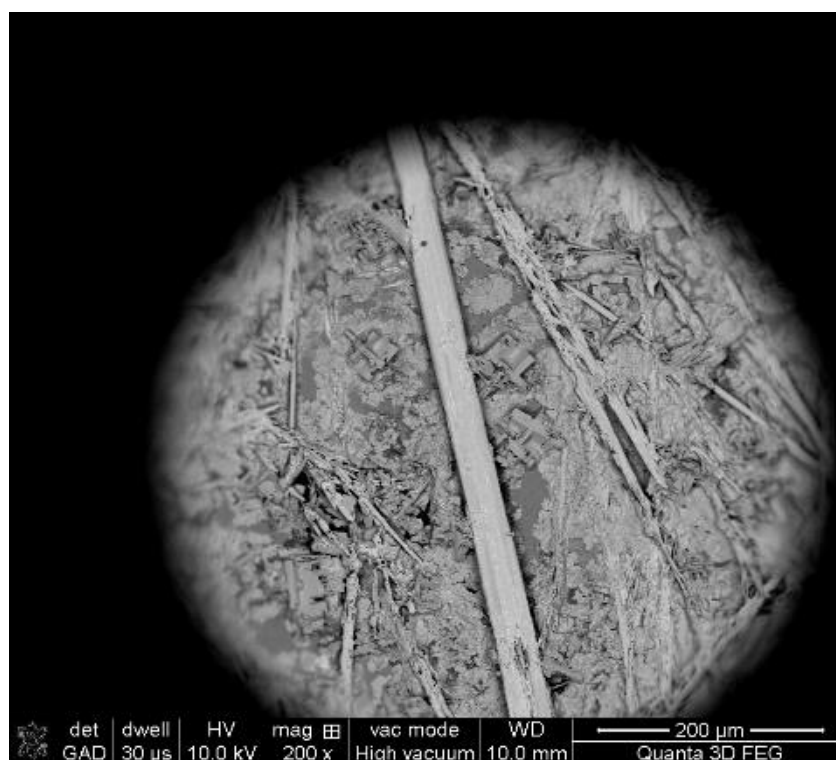

**Figure S1.** SEM micrograph depicting a large hybrid lead halide  $\text{CH}_3\text{NH}_3\text{PbI}_{3-x}\text{Cl}_x$  perovskite crystals obtained via CSA at 17 °C and a deposition speed of only 10  $\mu\text{m/s}$ .

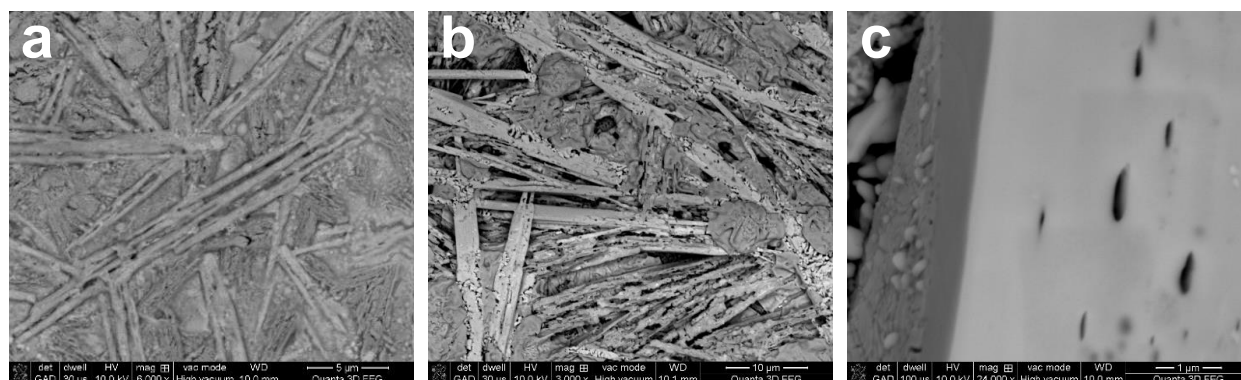

**Figure S2.** SEM micrographs depicting hybrid lead halide perovskite  $\text{CH}_3\text{NH}_3\text{PbI}_{3-x}\text{Cl}_x$  films prepared at 17 °C by spin-coating (a) and CSA (b, c) at both high (*i.e.*, 1000  $\mu\text{m/s}$ ) (b) and low (*i.e.*, 10  $\mu\text{m/s}$ ) (c) deposition speeds.

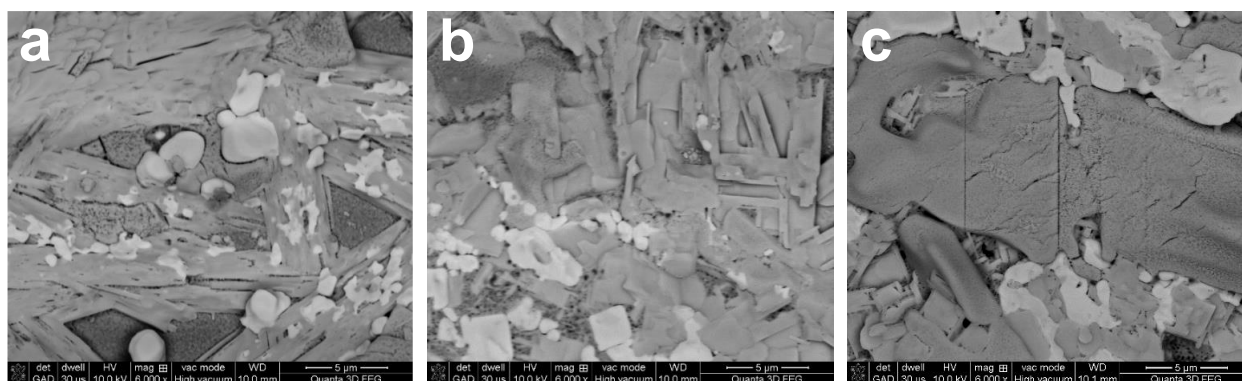

**Figure S3.** SEM micrographs depicting hybrid lead halide perovskite  $\text{CH}_3\text{NH}_3\text{PbI}_{3-x}\text{Cl}_x$  films prepared at 30 °C by spin-coating (a) and CSA (b, c) at both high (*i.e.*, 1000  $\mu\text{m/s}$ ) (b) and low (*i.e.*, 10  $\mu\text{m/s}$ ) (c) deposition speeds.

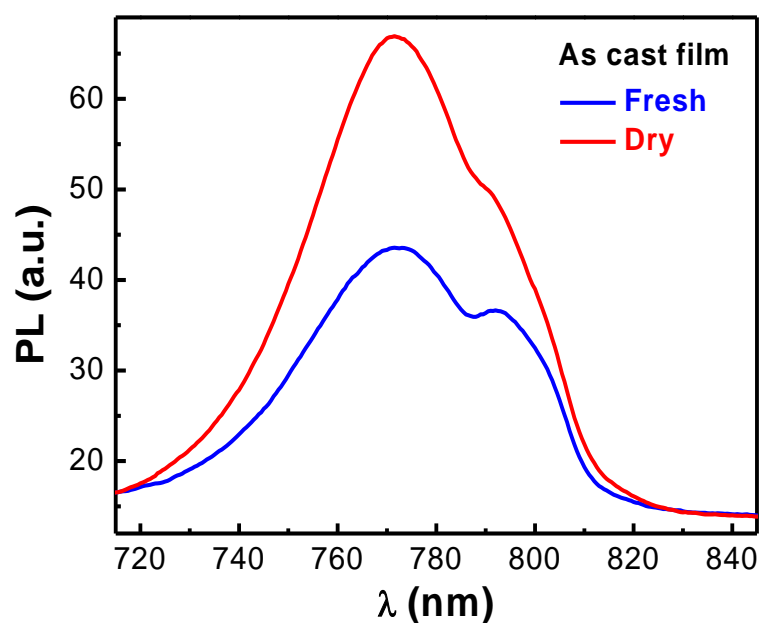

**Figure S4.** PL spectra depicting the emission properties of a perovskite film freshly obtained by spin coating a perovskite solution priorly kept at 17 °C and after its complete drying (*i.e.*, 120 minutes).
